# Supplementary material for: Plasma metabolomics profiling of maintenance hemodialysis based on capillary electrophoresis - time of flight mass spectrometry
Source: PubMed Central journal article supplement (PMC5557835; doi:10.1038/s41598-017-08327-w), 2017-08-15
Supplement: 41598_2017_8327_MOESM1_ESM.pdf [file 41598_2017_8327_MOESM1_ESM.pdf]

# Plasma metabolomics profiling of maintenance hemodialysis based on capillary electrophoresis - time of flight mass spectrometry

Shuxin Liu<sup>1#</sup>, Lichao Wang<sup>2,3,5,#</sup>, Chunxiu Hu<sup>2,5\*</sup>, Xin Huang<sup>4</sup>, Hong Liu<sup>1</sup>, Qiuhui Xuan<sup>2,5</sup>, Xiaohui Lin<sup>4</sup>, Xiaojun Peng<sup>3</sup>, Xin Lu<sup>2,5</sup>, Ming Chang<sup>1\*</sup>, Guowang Xu<sup>2,5\*</sup>

<sup>1</sup> Nephrology Department, Dalian Municipal Central Hospital, 826 Xinan Road, Dalian 116033, China.

<sup>2</sup> CAS Key Laboratory of Separation Sciences for Analytical Chemistry, Dalian Institute of Chemical Physics, Chinese Academy of Sciences, 457 Zhongshan Road, Dalian 116023, China.

<sup>3</sup> State Key Laboratory of Fine Chemicals, Dalian University of Technology, Dalian 116023, China.

<sup>4</sup> School of Computer Science & Technology, Dalian University of Technology, 116024, Dalian, China.

<sup>5</sup> University of Chinese Academy of Sciences, Beijing 100049, China.

# These authors contributed equally to this work. 1 and 2 have the equal intelligent knowledge right.

## Supplementary Information

**Table S1. No. of metabolites and accuracy rates obtained from SVM-RFE**

| Data                | No. (frequency $\geq$ 80%) | SVM-RFE             |
|---------------------|----------------------------|---------------------|
| pre-HD VS post-HD   | 99                         | 99.28% $\pm$ 0.52%  |
| pre-HFD VS post-HFD | 144                        | 100.00% $\pm$ 0.00% |
| pre-HD VS control   | 144                        | 99.76% $\pm$ 0.37%  |
| pre-HFD VS control  | 144                        | 100.00% $\pm$ 0.00% |
| post-HD VS control  | 49                         | 98.76% $\pm$ 0.71%  |
| post-HFD VS control | 70                         | 97.86% $\pm$ 0.79%  |

Data are presented as mean  $\pm$  SD

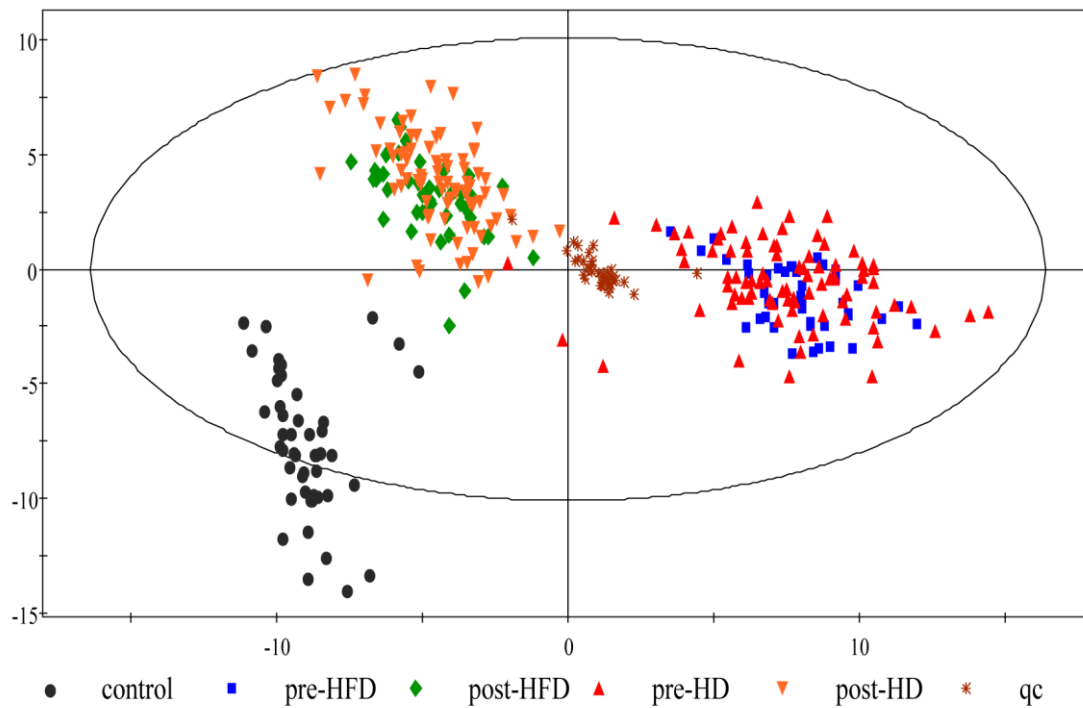

**Figure S1**

| PCA score plot of plasma metabolites in five groups after unit variance (UV) scaling pretreatment. Black dot means control group; blue box means pre-HFD group; green diamond means post-HFD group; red triangle means pre-HD group; orange inverted triangle means post-HD; brown star means qc group.
